# Supplementary material
Source: publisher figshare collection journal article supplement (https://acs.figshare.com/ndownloader/files/28413724)
Supplement: Supplementary file 1 [file 28413724]

# SUPPORTING INFORMATION FOR: ENERGETIC 1,2,4-TRIAZINES: 3,5-DIAMINO-6-NITRO-1,2,4-TRIAZINE AND ITS OXIDE

Shannon E. Creegan,<sup>ab</sup> Matthias Zeller,<sup>d</sup> Edward F. C. Byrd,<sup>e</sup> and Davin G. Piercey<sup>\*abc</sup>

<sup>a</sup> Purdue Energetic Research Center (PERC), Purdue University, 205 Gates rd., West Lafayette, IN 47906, USA.

<sup>b</sup> Department of Materials Engineering, Purdue University, 701 West Stadium Avenue, West Lafayette, IN 47907-2045

<sup>c</sup> Department of Mechanical Engineering, Purdue University, 585 Purdue Mall, West Lafayette, IN 47907-2088

<sup>d</sup> Department of Chemistry, Purdue University, 560 Oval Drive, West Lafayette, Indiana 47907, USA.

<sup>e</sup> U.S. Army Research Laboratory, Aberdeen Proving Ground, MD, 21005, USA

## Table of Contents

|                                            |   |
|--------------------------------------------|---|
| Experimental Methods .....                 | 2 |
| Crystallographic Data.....                 | 2 |
| Heats of Formation and Sublimation .....   | 5 |
| Thermal Stability.....                     | 5 |
| Mechanical Sensitivity .....               | 6 |
| Energetic Properties .....                 | 6 |
| References for Supporting Information..... | 7 |

## Experimental Methods

### General Safety Precautions

*Caution!* The materials prepared in this work are energetic with potential sensitivity to various stimuli. While no issues were encountered in the handling of these compounds, proper protective measures (face shield, ear protection, body armor, Kevlar gloves, and earthed equipment) are recommended.

### General Methods

All reagents and solvents were used as received unless otherwise stated. 3-Azido-5-amino-6-nitro-1,2,4-triazine was prepared according to literature.<sup>1</sup> <sup>1</sup>H and <sup>13</sup>C NMR spectra were recorded with a Bruker AV-III-500-HD and Bruker Avance-III-800 (5mm QCI Z-gradient cryoprobe) NMR spectrometer. All chemical shifts are quoted in ppm relative to TMS (1H, 13C). Infrared spectra were recorded with a PerkinElmer Spectrum Two spectrometer with UATR (Universal Attenuated Total Reflectance) accessory. Transmittance values are described as “strong” (s), “medium” (m), “weak” (w), and “very weak” (vw). Melting and decomposition points were measured with a TA Instruments Q50 TGA using heating rates of 5 °Cmin<sup>-1</sup>. Low resolution mass spectra were measured with an Agilent 1260 Infinity II Quaternary LC instrument. Sensitivity data were determined using a BAM friction tester and BAM Dropphammer (OZM research). Elemental analysis was performed using an Elementar vario EL cube elemental analyzer.

### 3,5-diamino-6-nitro-1,2,4-triazine (DANT)

3-azido-5-amino-6-nitro-1,2,4-triazine (AANT) (2 g; 10.98 mmol) was dissolved in ethanol (175 mL) and heated to 60°C. Stirring vigorously triphenylphosphine (1 eqv.; 2.89 g; 11.02 mmol) was added in portions. Upon the formation of precipitates nitric acid was added in 1 mL portions until solids dissolved. After AANT fully reacted with triphenylphosphine (2 hr) water (100 mL, 500 eqv.) was added to the reaction solution and stirred overnight at 60°C. The solvent was then removed via vacuum and the remaining solid extracted with hot ether (5x; 25 mL) to give DANT a pale-yellow solid (1.171 g; 68% yield). Recrystallization from hot water gives shiny-yellow flakes. <sup>1</sup>H NMR (DMSO-d): δ 8.26 (s, 1H), 7.98 (s, 1H), 7.84 (s, 1H), 7.63 (s, 1H); <sup>13</sup>C NMR: δ 162.49, 151.12, 143.07; LRMS: 156m/z; IR: 3419 (w), 3392 (w), 3315 (w), 3315 (w), 3215(w), 3169 (w), 3053 (w), 2840 (w), 2688 (w), 2154 (w), 1947 (w), 1623 (m), 1546 (m), 1499 (m), 1464 (m), 1432 (m), 1350 (m), 1306 (m), 1266 (w), 1194 (m), 1163 (m), 1120 (m), 1020 (m), 971 (m), 852 (m), 788 (m), 768 (m), 736 (m), 689 (m), 668 (m), 559 (s), 472 (s); Elemental Analysis (%) for C<sub>3</sub>N<sub>6</sub>H<sub>4</sub>O<sub>2</sub> (156.1029 gmol<sup>-1</sup>): Calcd. C 23.08; H 2.58; N 53.85; O 20.50; Found C 22.56; H 2.55; N 52.66; TGA: T<sub>dec.</sub> 240°C; Impact Sensitivity: >40 J; Friction Sensitivity: 160-192 N.

### 3,5-diamino-6-nitro-1,2,4-triazine-2-oxide (DANTX)

DANT (200mg; 1.28mmol) and Oxone® (0.6 eqv.; 472.6 mg) were stirred in water (5 mL) at 40°C for 12 hr. Additional portions of Oxone® (3x; 0.2 eqv.; 157.5 mg) were added in 12hr intervals and the reaction stirred at 40°C until completed. The solution was then extracted with hexane (3x; 10 mL), filtered and washed with water giving a reddish-orange solid (60 mg; 27% yield). The solid crystallized out of nitromethane and a THF/water mixture. <sup>1</sup>H NMR (DMSO-d): δ 9.11 (s, 1H), 8.68 (s, 1H), 8.49 (s, 1H), 8.22 (s, 1H); <sup>13</sup>C NMR: δ 152.13, 146.42, 127.27; LRMS: 172m/z; IR: 3480 (w), 3455 (w), 3419 (w), 3386 (w), 3362 (w), 3297 (w), 3224 (w), 3176 (w), 2157 (vw), 1664 (m), 1645 (m), 1606 (m), 1566 (m), 1525 (w), 1463 (m), 1435 (m), 1348 (w), 1320 (w), 1277 (m), 1189 (m), 1127 (m), 1080 (m), 965 (m), 912 (m), 868 (m), 803 (m), 758 (m), 744 (m), 721 (m), 690 (m), 668 (m), 643 (m), 601 (m), 552 (s), 498 (s), 470 (s); Elemental Analysis (%) for C<sub>3</sub>N<sub>6</sub>H<sub>4</sub>O<sub>3</sub> (172.1023gmol<sup>-1</sup>): Calcd. C 20.94; H 2.34; N 48.83; O 27.89; Found: C 20.32; H 2.21; N 47.97; TGA: T<sub>dec.</sub> 200°C; Impact Sensitivity: >40 J; Friction Sensitivity: 144 N (Sensitivity reported for the low-density DANTX polymorph).

## Crystallographic Data

Single crystal X-ray diffraction data for DANT were collected on a Bruker Quest diffractometer with a fixed chi angle, a Mo K $\alpha$  wavelength ( $\lambda = 0.71073 \text{ \AA}$ ) sealed tube fine focus X-ray tube, single crystal curved graphite incident beam monochromator, and a Photon II area detector. Data for the DANTX samples were collected on a Bruker Quest diffractometer with kappa geometry, a Cu K $\alpha$  wavelength ( $\lambda = 1.54178 \text{ \AA}$ ) I- $\mu$ -S microsource X-ray tube, laterally graded multilayer (Goebel) mirror for monochromatization, and a Photon III C14 area detector. Both instruments were equipped with an Oxford Cryosystems low temperature device and examination and data collection were performed at 150 K. Data were collected, reflections were indexed and processed, and the files scaled and corrected for absorption using APEX3<sup>2</sup> and SADABS<sup>3</sup>. The space groups were assigned using XPREP within the SHELXTL suite of programs<sup>4, 5</sup> and solved by direct methods using ShelXS<sup>5</sup> and refined by full matrix least squares against  $F^2$  with all reflections using Shelxl2018<sup>6, 7</sup> using the graphical interface Shelxl<sup>8</sup>. H atoms attached to carbon atoms were positioned geometrically and constrained to ride on their parent atoms. C-H bond distances were constrained to 0.98  $\text{\AA}$  for aliphatic CH<sub>3</sub> moieties and were allowed to rotate but not to tip to best fit the experimental electron density. The solvate molecule in the DANTX acetonitrile solvate is located on a two-fold axis and the methyl H-atoms are thus 1:1 disordered. N-H bond distances were either constrained to 0.88  $\text{\AA}$  and NH<sub>2</sub> groups were constrained to be planar (sp<sup>2</sup> hybridized) (for DANT, DANTX-DMSO solvate) or amine H atom positions were freely refined (DANTX low and high density polymorphs, DANTX-ACN solvate). U<sub>iso</sub>(H) values were set to a multiple of U<sub>eq</sub>(C) with 1.5 for CH<sub>3</sub> and 1.2 or 1.5 for NH<sub>2</sub> units, respectively.

Additional data collection and refinement details are given in the table below. Complete crystallographic data, in CIF format, have been deposited with the Cambridge Crystallographic Data Centre. CCDC 2057283-2057287 contain the supplementary crystallographic data for this paper. These data can be obtained free of charge from The Cambridge Crystallographic Data Centre via [www.ccdc.cam.ac.uk/data\\_request/cif](http://www.ccdc.cam.ac.uk/data_request/cif).

**Table 1. Crystallographic Data**

|                                            | DANT                                                        |                                                             | DANTX                                                       |                                                                                               |                                                                                                 |
|--------------------------------------------|-------------------------------------------------------------|-------------------------------------------------------------|-------------------------------------------------------------|-----------------------------------------------------------------------------------------------|-------------------------------------------------------------------------------------------------|
| Name                                       | DANT                                                        | Low density polymorph                                       | High-density polymorph                                      | Dimethyl sulfoxide solvate                                                                    | Acetonitrile solvate                                                                            |
| Crystallization Solvent                    | Water                                                       | Nitromethane                                                | Tetrahydrofuran                                             | Dimethyl Sulfoxide                                                                            | Acetonitrile                                                                                    |
| Formula                                    | C <sub>3</sub> H <sub>4</sub> N <sub>6</sub> O <sub>2</sub> | C <sub>3</sub> H <sub>4</sub> N <sub>6</sub> O <sub>3</sub> | C <sub>3</sub> H <sub>4</sub> N <sub>6</sub> O <sub>3</sub> | C <sub>3</sub> H <sub>4</sub> N <sub>6</sub> O <sub>3</sub> •C <sub>2</sub> H <sub>6</sub> OS | 2(C <sub>3</sub> H <sub>4</sub> N <sub>6</sub> O <sub>3</sub> )•C <sub>2</sub> H <sub>3</sub> N |
| Formula Weight [g mol <sup>-1</sup> ]      | 156.12                                                      | 172.12                                                      | 172.12                                                      | 250.25                                                                                        | 385.30                                                                                          |
| Temperature [K]                            | 150                                                         | 150                                                         | 150                                                         | 150                                                                                           | 150                                                                                             |
| Crystal System                             | monoclinic                                                  | triclinic                                                   | monoclinic                                                  | triclinic                                                                                     | monoclinic                                                                                      |
| Space Group                                | <i>P</i> 2 <sub>1</sub> / <i>c</i>                          | <i>P</i> $\bar{1}$                                          | <i>P</i> 2 <sub>1</sub> / <i>c</i>                          | <i>P</i> $\bar{1}$                                                                            | <i>C</i> <sub>2</sub> / <i>c</i>                                                                |
| a [Å]                                      | 4.6115 (11)                                                 | 6.6850 (5)                                                  | 5.0535 (3)                                                  | 5.4545 (2)                                                                                    | 16.754 (4)                                                                                      |
| b [Å]                                      | 16.953 (4)                                                  | 8.7556 (6)                                                  | 5.3907 (3)                                                  | 9.4042 (3)                                                                                    | 12.645 (2)                                                                                      |
| c [Å]                                      | 7.4329 (19)                                                 | 11.9207 (8)                                                 | 22.3375 (11)                                                | 10.8334 (5)                                                                                   | 7.1381 (15)                                                                                     |
| α [°]                                      | 90                                                          | 79.812 (3)                                                  | 90                                                          | 98.907 (2)                                                                                    | 90                                                                                              |
| β [°]                                      | 100.679 (10)                                                | 81.840 (3)                                                  | 93.131 (4)                                                  | 102.005 (2)                                                                                   | 95.214 (11)                                                                                     |
| γ [°]                                      | 90                                                          | 69.876 (3)                                                  | 90                                                          | 99.824 (1)                                                                                    | 90                                                                                              |
| V [Å <sup>3</sup> ]                        | 571.0 (2)                                                   | 642.32 (8)                                                  | 607.61 (6)                                                  | 525.03 (4)                                                                                    | 1506.0 (5)                                                                                      |
| Z                                          | 4                                                           | 4                                                           | 4                                                           | 2                                                                                             | 4                                                                                               |
| ρ [g cm <sup>-3</sup> ] [150 K]            | 1.816                                                       | 1.780                                                       | 1.882                                                       | 1.583                                                                                         | 1.699                                                                                           |
| R <sub>1</sub> /wR <sub>2</sub> (all data) | 0.1265/0.1858                                               | 0.0463/0.1373                                               | 0.0376/0.1043                                               | 0.0476/0.1215                                                                                 | 0.0383/0.1019                                                                                   |
| R <sub>2</sub> /wR <sub>2</sub> (I>2σ)     | 0.0707/0.1612                                               | 0.0430/0.1337                                               | 0.0359/0.1024                                               | 0.0442/0.1181                                                                                 | 0.0355/0.0990                                                                                   |
| S                                          | 1.01                                                        | 1.12                                                        | 1.14                                                        | 1.07                                                                                          | 1.04                                                                                            |
| No. of reflec.                             | 1408                                                        | 2587                                                        | 1308                                                        | 2140                                                                                          | 1455                                                                                            |
| Restraints                                 | 0                                                           | 0                                                           | 0                                                           | 0                                                                                             | 0                                                                                               |
| CCDC <sup>a</sup>                          | 2057283                                                     | 2057287                                                     | 2057284                                                     | 2057286                                                                                       | 2057285                                                                                         |

<sup>a</sup>These data can be obtained free of charge from The Cambridge Crystallographic Data Centre via [www.ccdc.cam.ac.uk/data\\_request/cif](http://www.ccdc.cam.ac.uk/data_request/cif).

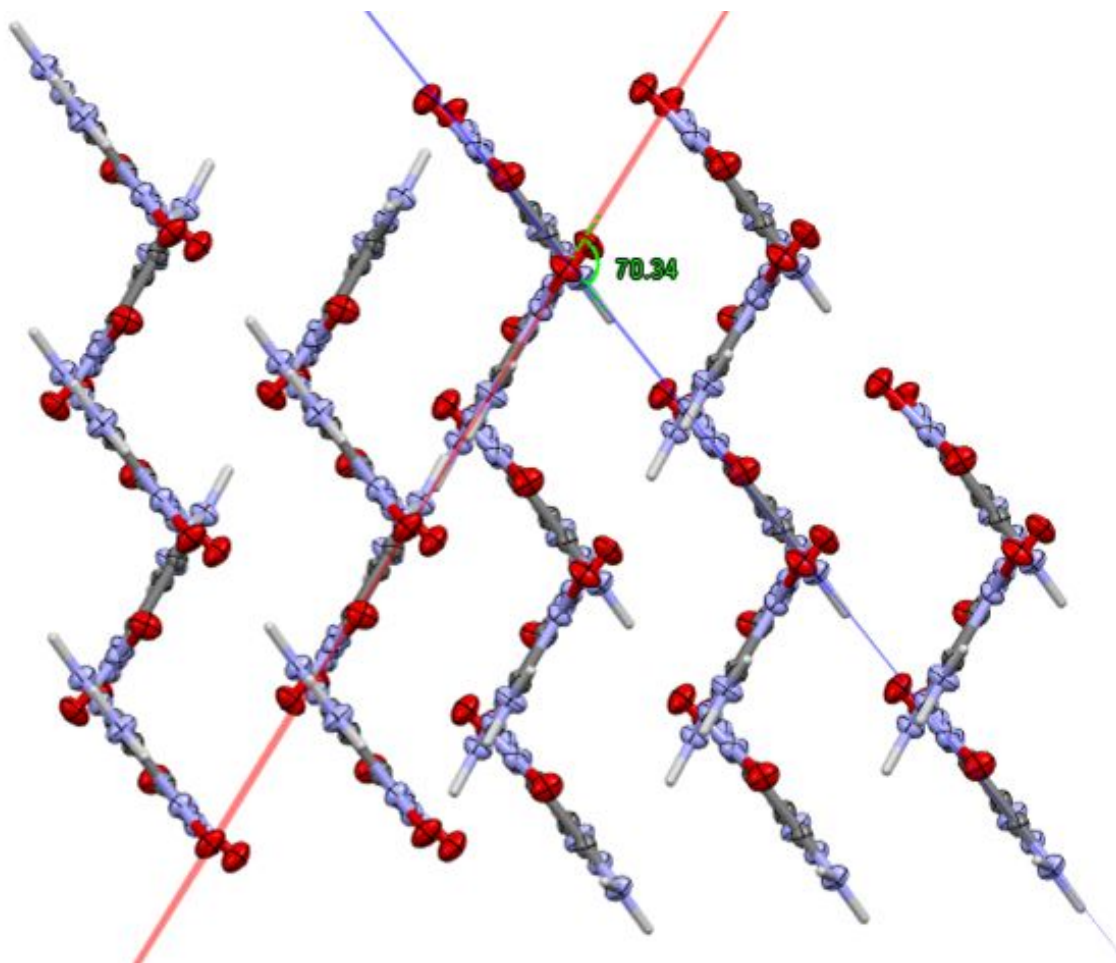

Figure 1. Ribbon rotation for mixed crystal structure of high-density DANTX.

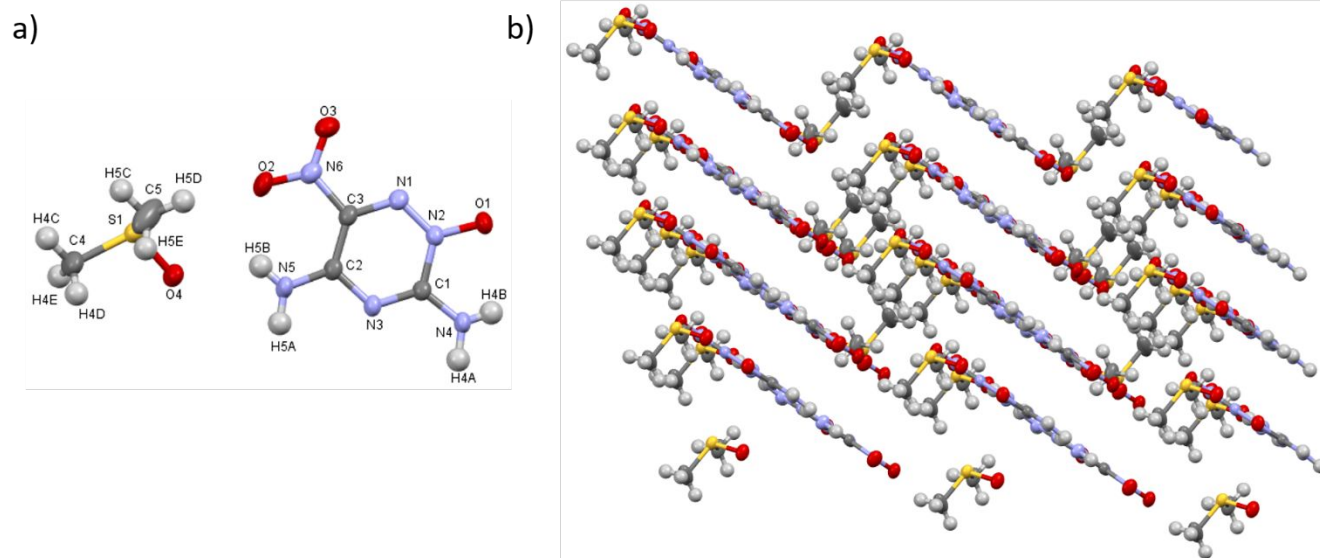

Figure 2. a) DMSO solvated-crystal X-ray structure of DANTX; b) Packing diagram of DANTX•DMSO solvated crystal

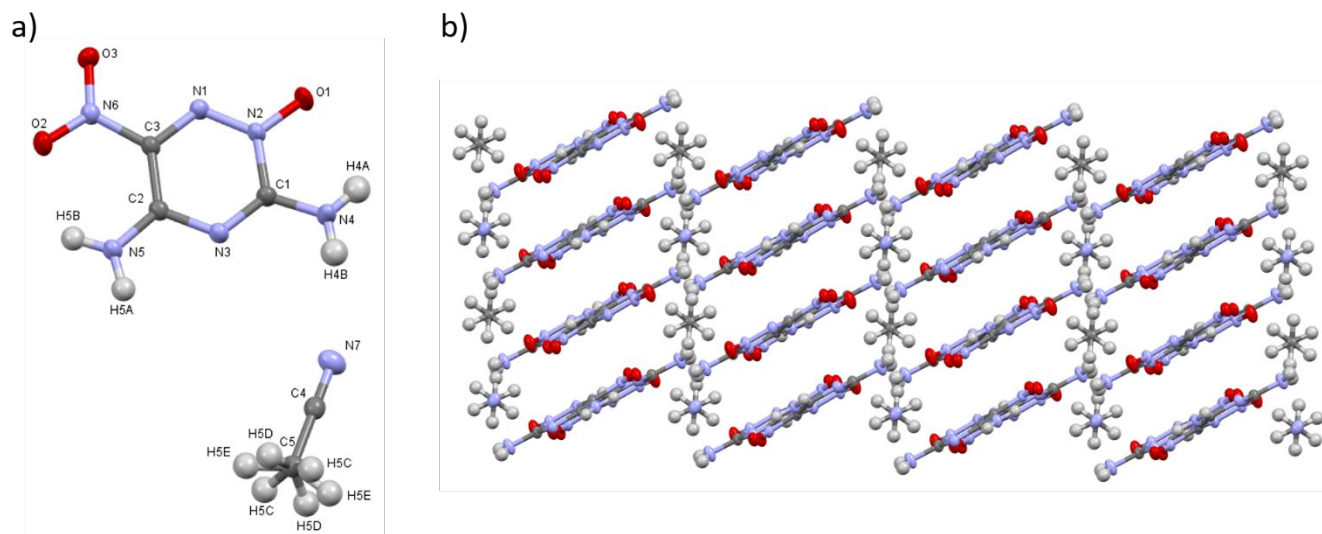

Figure 3. a) MeCN solvated-crystal X-ray structure of DANTX; b) Packing diagram of DANTX•1/2MeCN solvated crystal

### Heats of Formation and Sublimation

**Table 2. Heats of formation and sublimation for DANT and DANTX**

|       | Solid-State $\Delta_f H_m$<br>[kJ mol <sup>-1</sup> ] | Gas-phase $\Delta_f H$<br>[kJ mol <sup>-1</sup> ] | $\Delta H_{sub}$<br>[kJ mol <sup>-1</sup> ] |
|-------|-------------------------------------------------------|---------------------------------------------------|---------------------------------------------|
| DANT  | 134.1                                                 | 236.04                                            | 101.95                                      |
| DANTX | 102.1                                                 | 205.66                                            | 103.55                                      |

### Thermal Stability

Thermal stabilities were measured by TGA in platinum pans with a heating rate of 5°C per minute; onset of decomposition temperatures were determined as the temperature at which 5% mass loss occurred.

#### TGA of DANT and DANTX

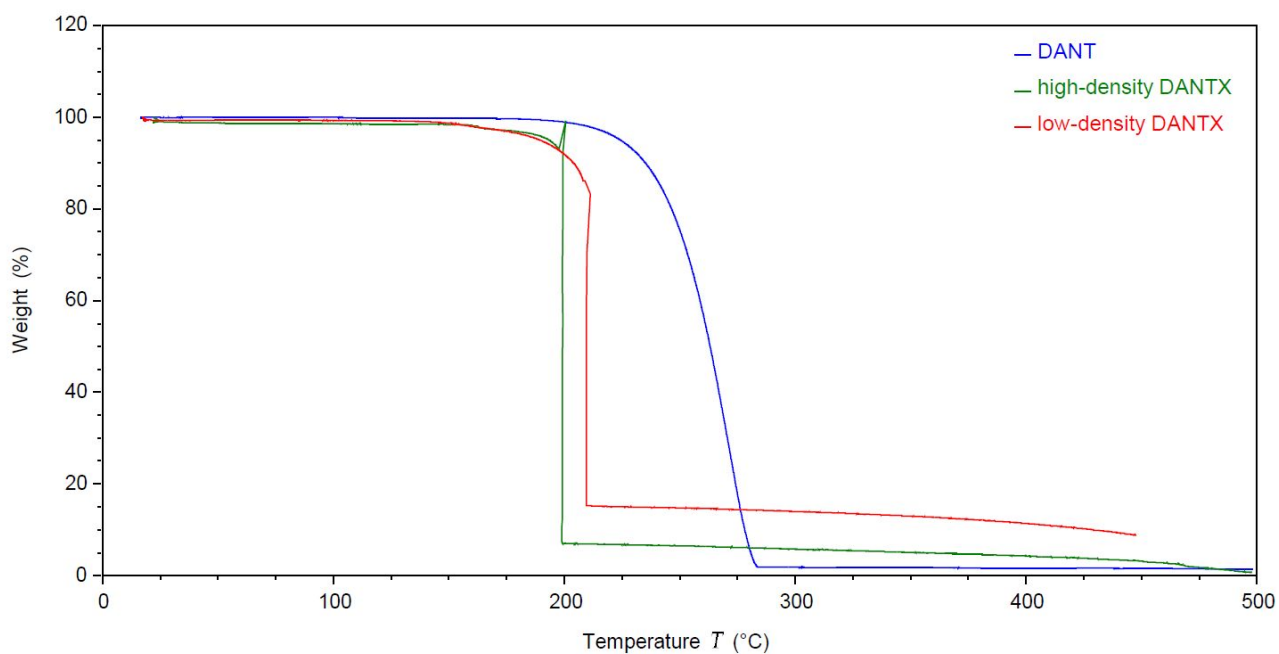

Figure 4. Graph of DANT and DANTX TGA curves generated by TA Instruments Trios V4.4.0.40883

## Mechanical Sensitivity

For initial safety testing, impact and friction sensitivities were determined for DANT and DANTX. Impact sensitivity was carried out according to STANAG 4489<sup>9</sup> and modified according to instruction<sup>10</sup> on an OZM drophammer by the BAM method<sup>11</sup>. Friction sensitivity was carried out in accordance with STANAG 4487<sup>12</sup> and modified according to instruction<sup>13</sup> using a BAM friction tester. The determination of DANT decomposition was made based on color-change from yellow to orange.

## Energetic Properties

With the Gaussian09 program package<sup>14</sup>, the molecular geometries of DANT and DANTX were optimized using the B<sub>3</sub>LYP spin-restricted Kohn-Sham density functional theory (KS-DFT)<sup>15-18</sup> with the 6-31G\*\* Pople Gaussian basis set<sup>19-21</sup>. Using the Byrd and Rice method<sup>22-24</sup> for neutral molecules, computational enthalpies of formation and densities were calculated. The computational densities were obtained by dividing the mass of the molecule by the volume calculated from the volume contained within the B<sub>3</sub>LYP/6-31G\*\* 0.001 electron/bohr<sup>3</sup> isosurface of the electron density, and subsequently modified by electrostatic parameters generated from charge distributions of said isosurface. For the computational heat of formation, the B<sub>3</sub>LYP/6-311++G(2df,2p) energy was computed from the B<sub>3</sub>LYP/6-31G\* optimized geometry to obtain the gas phase heat of formation.

The detonation parameters, for the compounds, at the CJ point were calculated with the EXPLO6.05 software package<sup>25, 26</sup> using the computational heat of formation and the density measured by single-crystal X-ray at room temperature. For solid carbon the software uses the Becker-Kistiakowsky-Wilson's equation of state (CFEOS)<sup>27</sup>. The equilibrium composition of detonation products was calculated utilizing the modified White, Johnson, and Dantzig's free energy minimization technique. BKWN parameters ( $\alpha$ ,  $\beta$ ,  $\kappa$ ,  $\theta$ ) were used in the following BKW equation, with  $X_i$  representing the mol fraction of the  $i^{\text{th}}$  gaseous product and  $k_i$  being the molar co-volume of said  $i^{\text{th}}$  gaseous product:<sup>26, 28-30</sup>

$$\frac{pV}{RT} = 1 + x e^{\beta x} x = \frac{(\kappa \sum X_i k_i)}{[V(T + \theta)]^\alpha}$$

$$\alpha = 0.5, \beta = 0.38, \kappa = 9.41, \theta = 4250$$

**Table 3. Energetic properties and detonation parameters of DANT and DANTX polymorphs**

|                                                                  | DANT                                                        | DANTX                                                       | DPX-26 <sup>31</sup>                                        | DPX-27 <sup>31</sup>                                        | ICM-102 <sup>32</sup>                                       | TATB <sup>32</sup>                                          | RDX                                                         |                     |
|------------------------------------------------------------------|-------------------------------------------------------------|-------------------------------------------------------------|-------------------------------------------------------------|-------------------------------------------------------------|-------------------------------------------------------------|-------------------------------------------------------------|-------------------------------------------------------------|---------------------|
| Formula                                                          | C <sub>3</sub> H <sub>4</sub> N <sub>6</sub> O <sub>2</sub> | C <sub>3</sub> H <sub>4</sub> N <sub>6</sub> O <sub>3</sub> | C <sub>4</sub> H <sub>2</sub> N <sub>8</sub> O <sub>4</sub> | C <sub>4</sub> H <sub>2</sub> N <sub>8</sub> O <sub>5</sub> | C <sub>4</sub> H <sub>6</sub> N <sub>6</sub> O <sub>4</sub> | C <sub>6</sub> H <sub>6</sub> N <sub>6</sub> O <sub>6</sub> | C <sub>3</sub> H <sub>6</sub> N <sub>6</sub> O <sub>6</sub> |                     |
| FW [g mol <sup>-1</sup> ]                                        | 156.10                                                      | 172.10                                                      | 226.11                                                      | 242.12                                                      | 202.13                                                      | 258.15                                                      | 222.12                                                      |                     |
| IS [J] [a]                                                       | >40                                                         | >40 <sup>[m]</sup>                                          | 29                                                          | 10.3                                                        | >60                                                         | >60                                                         | 7.5                                                         |                     |
| FS [N] [b]                                                       | 160-192                                                     | 144 <sup>[m]</sup>                                          | >360                                                        | 258                                                         | >360                                                        | >360                                                        | 120                                                         |                     |
| N [%] <sup>[c]</sup>                                             | 52.7                                                        | 47.97                                                       | 46.30                                                       | 46.3.0                                                      | -                                                           | -                                                           | 37.84                                                       |                     |
| $\Omega$ [%] <sup>[d]</sup>                                      | -61.49                                                      | -46.48                                                      | -                                                           | -                                                           | -55.45                                                      | -55.81                                                      | -21.61                                                      |                     |
| T <sub>dec</sub> [°C] <sup>[e]</sup>                             | 225                                                         | 190 <sup>[m]</sup> /196 <sup>[n]</sup>                      | 232                                                         | 138                                                         | 284                                                         | 360                                                         | 205                                                         |                     |
| $\Delta_f H_m^\circ$ [kJ mol <sup>-1</sup> ] [f]                 | 134.1                                                       | 102.1                                                       | 387                                                         | 378                                                         | -8.1                                                        | -139.5                                                      | 86.3                                                        |                     |
| $\rho$ [g cm <sup>-3</sup> ] <sup>calc</sup>                     | 1.742                                                       | 1.814                                                       | -                                                           | 1.904                                                       | -                                                           | -                                                           | -                                                           |                     |
|                                                                  |                                                             | Low-Density                                                 | High-Density                                                |                                                             |                                                             |                                                             |                                                             |                     |
| $\rho$ [g cm <sup>-3</sup> ] <sup>[g]</sup>                      | 1.778                                                       | 1.747                                                       | 1.852                                                       | 1.86                                                        | -                                                           | 1.95 <sup>[o]</sup>                                         | 1.94 <sup>[o]</sup>                                         | 1.80 <sup>[p]</sup> |
| EXPLO6                                                           |                                                             |                                                             |                                                             |                                                             |                                                             |                                                             |                                                             |                     |
| $-\Delta_{Ex} U^\circ$ [kJ kg <sup>-1</sup> ] <sup>[h]</sup>     | -3445                                                       | -4046                                                       | -4065                                                       | -                                                           | -                                                           | -                                                           | -                                                           | -5740               |
| T <sub>det</sub> [K] <sup>[i]</sup>                              | 2584                                                        | 2973                                                        | 2915                                                        | -                                                           | -                                                           | -                                                           | -                                                           | 3745                |
| P <sub>CJ</sub> [GPa] <sup>[j]</sup>                             | 22.91                                                       | 24.20                                                       | 27.82                                                       | 32                                                          | 35.4                                                        | 34.3                                                        | 32.4                                                        | 33.63               |
| V <sub>Det.</sub> [m s <sup>-1</sup> ] <sup>[k]</sup>            | 7896                                                        | 7938                                                        | 8407                                                        | 8700                                                        | 8970                                                        | 9169                                                        | 8114                                                        | 8801                |
| V <sub>o</sub> [cm <sup>3</sup> g <sup>-1</sup> ] <sup>[l]</sup> | 774                                                         | 772                                                         | 761                                                         | -                                                           | -                                                           | -                                                           | -                                                           | 784                 |

[a] impact sensitivity (BAM drophammer (1 of 6)); [b] friction sensitivity (BAM friction tester (1 of 6)); [c] nitrogen content; [d] oxygen balance ( $\Omega = (xO - 2yC - 1/2zH)M/1600$ ); [e] onset decomposition temperature from DSC or TGA ( $\beta = 5$  °C); [f] calculated solid-state heat of formation; [g] room temperature density by X-ray diffraction; [h] energy of explosion; [i] detonation temperature; [j] detonation pressure; [k] detonation velocity; [l] volume of detonation gases (assuming only gaseous products); [m] value determined for low-density DANTX polymorph; [n] value determined for high-density DANTX; [o] density measured by gas pycnometry; [p] density referenced from<sup>33</sup>

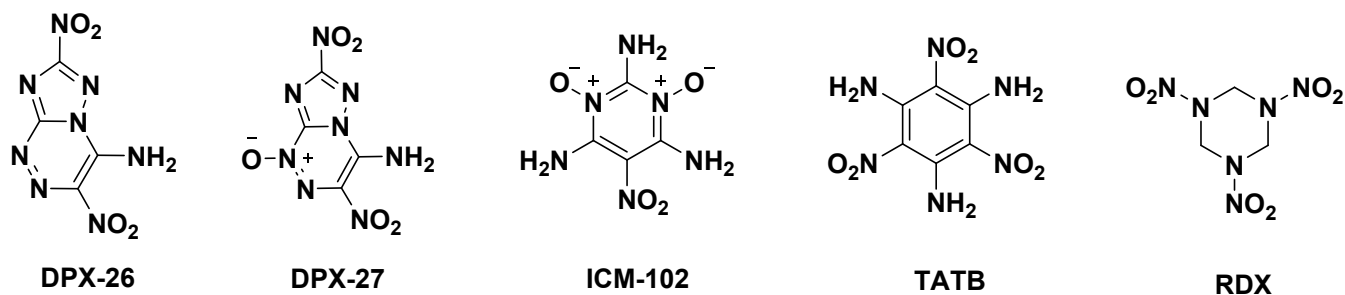

Figure 5. Structures for compounds referenced in Table 2.

## References for Supporting Information

- Creegan, S. E.; Zeller, M.; Byrd, E. F. C.; Piercey, D. G., Synthesis and Characterization of the Energetic 3-Azido-5-amino-6-nitro-1,2,4-triazine. *Propellants Explos. Pyrotech.* **2021**, *46* (2), 214-221.
- Bruker Apex3 v2019.1-0, Saint V8.40A, Bruker AXS Inc., Madison (WI), USA, 2019.
- Krause, L.; Herbst-Irmer, R.; Sheldrick, G. M.; Stalke, D., Comparison of silver and molybdenum microfocus X-ray sources for single-crystal structure determination. *J. Appl. Crystallogr.* **2015**, *48* (1), 3-10.
- SHELXTL suite of programs, Version 6.14, Bruker Advanced X-ray Solutions, Bruker AXS Inc., Madison, Wisconsin: USA 2000-2003.
- Sheldrick, G., A short history of SHELX. *Acta Crystallographica Section A* **2008**, *64* (1), 112-122.
- Sheldrick, G., Crystal structure refinement with SHELXL. *Acta Cryst. C* **2015**, *71* (1), 3-8.
- Sheldrick, G. M., *University of Göttingen, Germany* **2018**.
- Hübschle, C. B.; Sheldrick, G. M.; Dittrich, B., ShelXle: a Qt graphical user interface for SHELXL. *J. Appl. Crystallogr.* **2011**, *44* (Pt 6), 1281-1284.
- NATO Standardization Agreement (STANAG) on Explosives; Impact Sensitivity Test, no. 4489; Brussels, September 17, 1999.
- WIWEB-Standardarbeitsanweisung 4-5.1.02; Ermittlung der Explosions- gefährlichkeit, hier: der Schlagempfindlichkeit mit dem Fallhammer; Erding, November 8, 2002.
- BAM BAM. <https://www.bam.de/>.
- NATO Standardization Agreement (STANAG) on Explosives; Friction Sensitivity Tests, no. 4487; Brussels, August 22, 2002.
- WIWEB-Standardarbeitsanweisung 4-5.1.03; Ermittlung der Explosions gefährlichkeit oder der Reibeempfindlichkeit mit dem Reibeapparat; Erding, November 8, 2002.
- M. J. Frisch, G. W. Trucks, H. B.; Schlegel, G. E. S., M. A. Robb, J. R. Cheeseman, G. Scalmani, V. Barone; B. Mennucci, G. A. P. Gaussian 09, Wallingford CT, n.d.
- Becke, A. D., Density-functional thermochemistry. III. The role of exact exchange. *J. Chem. Phys.* **1993**, *98* (7), 5648-5652.
- Lee, C.; Yang, W.; Parr, R. G., Development of the Colle-Salvetti correlation-energy formula into a functional of the electron density. *Phys. Rev. B* **1988**, *37* (2), 785-789.
- Vosko, S. H.; Wilk, L.; Nusair, M., Accurate spin-dependent electron liquid correlation energies for local spin density calculations: a critical analysis. *Can. J. Phys.* **1980**, *58* (8), 1200-1211.
- Stephens, P. J.; Devlin, F. J.; Chabalowski, C. F.; Frisch, M. J., Ab Initio Calculation of Vibrational Absorption and Circular Dichroism Spectra Using Density Functional Force Fields. *J. Phys. Chem.* **1994**, *98* (45), 11623-11627.
- Krishnan, R.; Binkley, J. S.; Seeger, R.; Pople, J. A., Self-consistent molecular orbital methods. XX. A basis set for correlated wave functions. *J. Chem. Phys.* **1980**, *72* (1), 650-654.
- Frisch, M. J.; Pople, J. A.; Binkley, J. S., Self-consistent molecular orbital methods 25. Supplementary functions for Gaussian basis sets. *J. Chem. Phys.* **1984**, *80* (7), 3265-3269.
- Schleyer, P. V. R.; Clark, T.; Kos, A. J.; Spitznagel, G. W.; Rohde, C.; Arad, D.; Houk, K. N.; Rondan, N. G., Structures and stabilities of  $\alpha$ -hetero-substituted organolithium and organosodium compounds. Energetic unimportance of d-orbital effects. *J. Am. Chem. Soc.* **1984**, *106* (22), 6467-6475.
- Byrd, E. F. C.; Rice, B. M., A Comparison of Methods To Predict Solid Phase Heats of Formation of Molecular Energetic Salts. *J. Phys. Chem. A* **2009**, *113* (1), 345-352.
- Rice, B. M.; Byrd, E. F. C., Evaluation of electrostatic descriptors for predicting crystalline density. *J. Comput. Chem.* **2013**, *34* (25), 2146-2151.
- Rice, B. M.; Hare, J. J.; Byrd, E. F. C., Accurate Predictions of Crystal Densities Using Quantum Mechanical Molecular Volumes. *J. Phys. Chem. A* **2007**, *111* (42), 10874-10879.
- Sučeska, M., Zagreb. Croat., 2018.
- Sučeska, M., *Mater. Sci. Forum*, 2009; Vol. 465-466, p 325.
- Sučeska, M., EXPLO6.04 Program. Zagreb, Croatia, 2017.
- Sučeska, M., Calculation of the Detonation Properties of C-H-N-O explosives. *Propellants Explos. Pyrotech.* **1991**, *16* (4), 197-202.
- Sučeska, M., Evaluation of Detonation Energy from EXPLO5 Computer Code Results. *Propellants Explos. Pyrotech.* **1999**, *24* (5), 280-285.
- Hobbs, M. L.; Baer, M. R., Proc. Of the 10th Symp. (International) on Detonation, ONR 33395-12. Boston, MA., July 12-16, 1993; p 409.

31. Piercey, D. G.; Chavez, D. E.; Scott, B. L.; Imler, G. H.; Parrish, D. A., An Energetic Triazolo-1,2,4-Triazine and its N-Oxide. *Angew. Chem. Int. Ed.* **2016**, *55* (49), 15315-15318.
32. Wang, Y.; Liu, Y.; Song, S.; Yang, Z.; Qi, X.; Wang, K.; Liu, Y.; Zhang, Q.; Tian, Y., Accelerating the discovery of insensitive high-energy-density materials by a materials genome approach. *Nature Communications* **2018**, *9* (1), 2444.
33. Kettner, M. A.; Klapötke, T. M., Synthesis of New Oxidizers for Potential Use in Chemical Rocket Propulsion. In *Chemical Rocket Propulsion: A Comprehensive Survey of Energetic Materials*, De Luca, L. T.; Shimada, T.; Sinditskii, V. P.; Calabro, M., Eds. Springer International Publishing: Cham, 2017; pp 63-88.
